# Supplementary material
Source: Springer Nature journal article supplement (https://www.springermedizin.de/resource/supplementary/12943_2013_1250_MOESM5_ESM.pdf/9553056)
Supplement: MOESM5 [file 9553056]

### Additional file 5

Compared of global DNA methylation levels between BRCA1-mutated breast cancer and their adjacent normal breast tissues

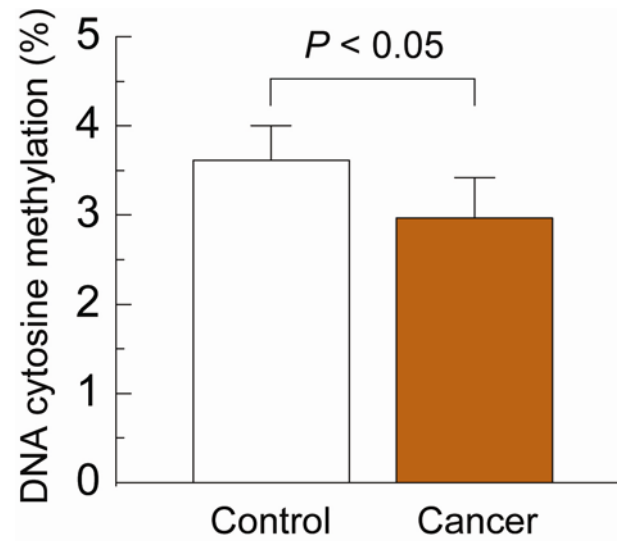

Each experiment was repeated three times for each tissues (n = 15). Bar graphs show mean  $\pm$  SD.
